# Supplementary material for: Ultra-Fast Construction of Novel S-Scheme CuBi2O4/CuO Heterojunction for Selectively Photocatalytic CO2 Conversion to CO
Source: MDPI journal article supplement (doi:10.3390/nano12183247), 2022-09-19
Supplement: s1 [file s1]

## *Supplementary Material*

# **Ultra-Fast Construction of Novel S-Scheme CuBi<sub>2</sub>O<sub>4</sub>/CuO Heterojunction for Selectively Photocatalytic CO<sub>2</sub> Conversion to CO**

Weina Shi <sup>1</sup>, Xiu Qiao <sup>2</sup>, Jichao Wang <sup>2,\*</sup>, Miao Zhao <sup>1</sup>, Hongling Ge <sup>2</sup>, Jingjing Ma <sup>2</sup>,  
Shanqin Liu <sup>2</sup>  
and Wanqing Zhang <sup>2,\*</sup>

<sup>1</sup> School of Chemistry and Materials Engineering, Xinxiang University,  
Xinxiang 453000, China

<sup>2</sup> College of Chemistry and Chemical Engineering, Henan Institute of Science  
and Technology, Xinxiang 453000, China

\* Correspondence: wangjichao@hist.edu.cn (J.-C.W.); zhangwqzzu@163.com  
(W.Z.); Tel.: +86-0373-304-0418 (J.-C.W. & W.Z.)

**Table S1.** Binding energy and band gap of the obtained samples by XPS and

| DRS measurements |        |        |        |        |
|------------------|--------|--------|--------|--------|
| Sample           | Bi 4f  | Cu 2p  | VB     | Eg     |
|                  | ( eV ) | ( eV ) | ( eV ) | ( eV ) |
| CBO              | 158.84 | -      | 1.02   | 1.86   |
| CuO              | -      | 934.01 | 1.44   | 1.70   |
| 30CBO/CuO        | 158.95 | 933.84 | -      | -      |

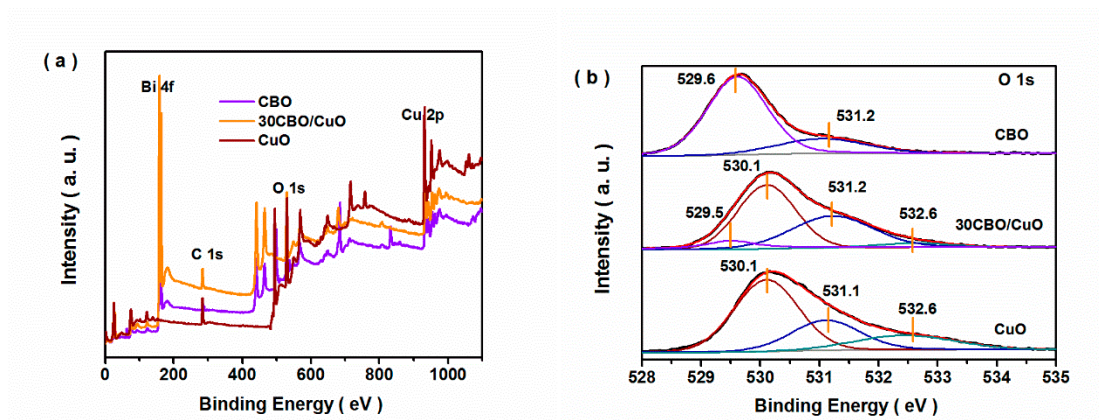

**Figure S1.** Survey spectra (a) and high resolution O 1s XPS spectra (b) of the CBO, CuO and 30CBO/CuO samples.

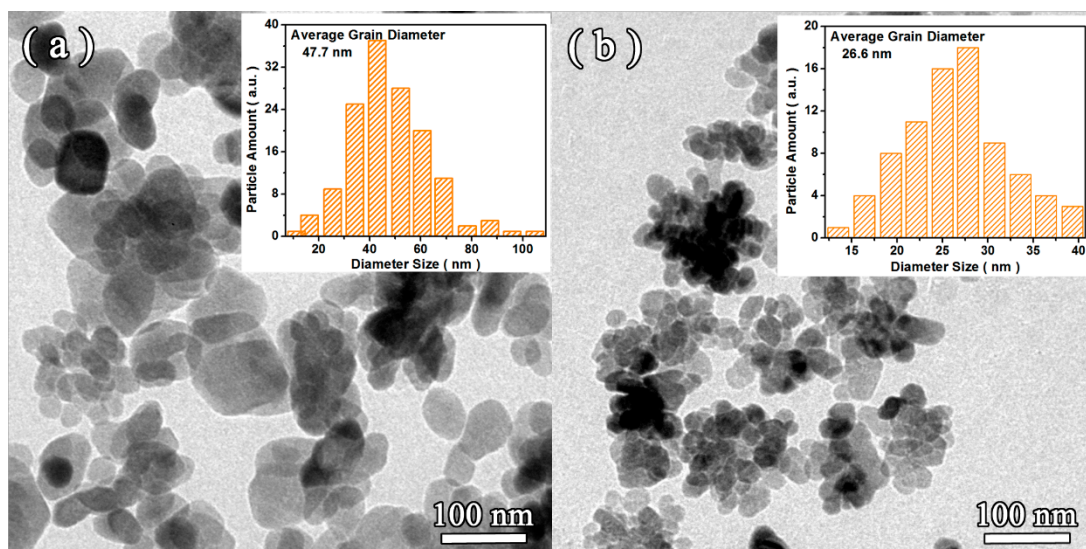

**Figure S2.** TEM image of CBO (a) and CuO (b) samples (inset: diameter size distribution)

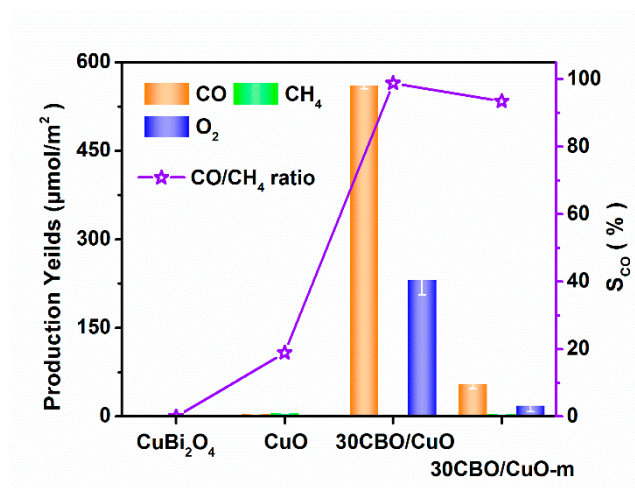

**Figure S3.** Photocatalytic activity for different samples after 3 h of visible-light illumination.
